# Supplementary material for: Modified FOLFIRINOX as a Second-Line Treatment for Patients with Gemcitabine-Failed Advanced Biliary Tract Cancer: A Prospective Multicenter Phase II Study
Source: MDPI journal article supplement (doi:10.3390/cancers14081950), 2022-04-13
Supplement: s1 [file s1]

Article

# Modified FOLFIRINOX as a Second-Line Treatment for Patients with Gemcitabine-Failed Advanced Biliary Tract Cancer: A Prospective Multicenter Phase II Study

Yong-Pyo Lee, Sung Yong Oh, Kwang Min Kim, Se-Il Go, Jung Hoon Kim, Seok Jae Huh, Jung Hun Kang and Jun Ho Ji

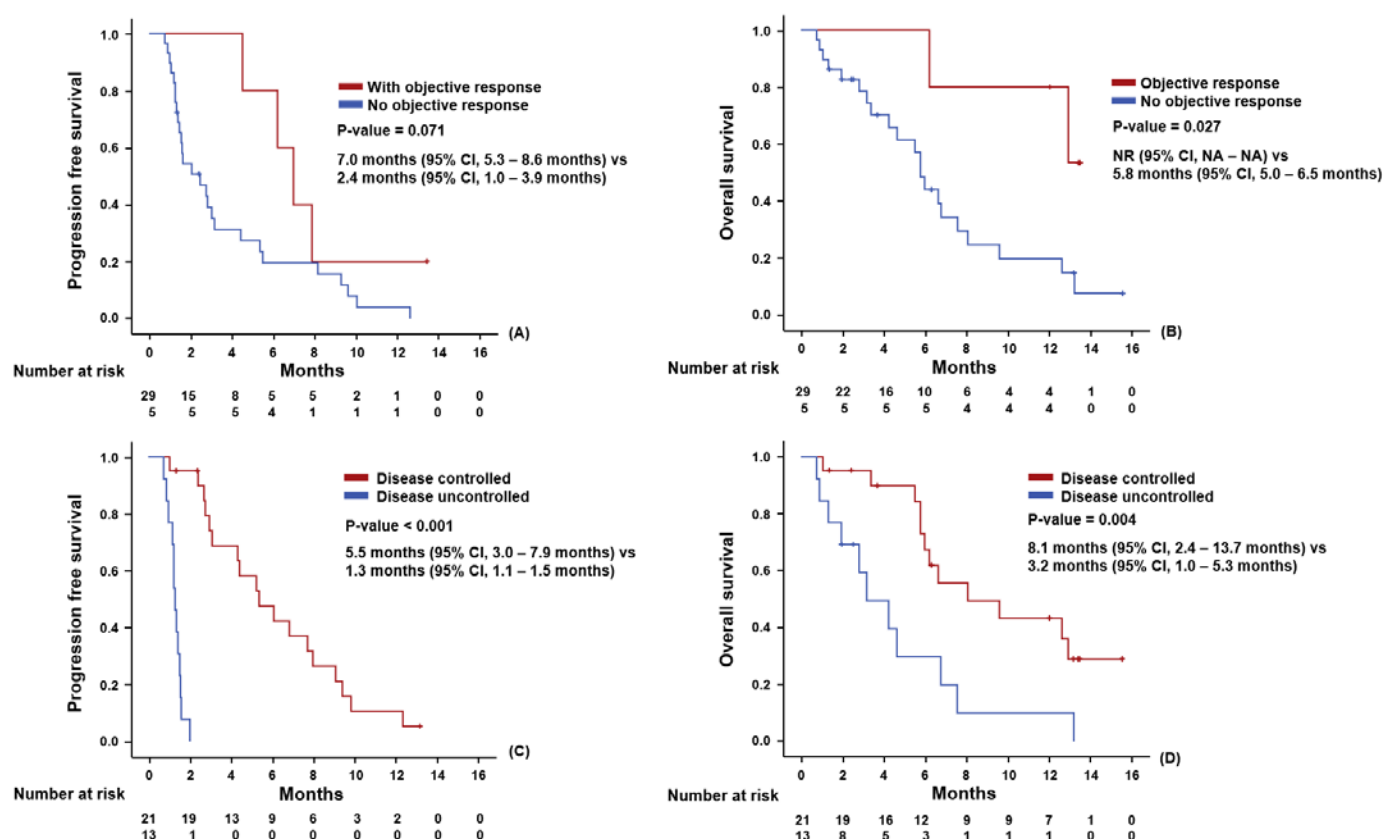

**Supplementary Figure S1.** Kaplan–Meier curves of progression-free survival (A) and overall survival (B) for achieving objective responses. Kaplan–Meier curves of progression-free survival (C), and overall survival (D) for obtaining disease control.

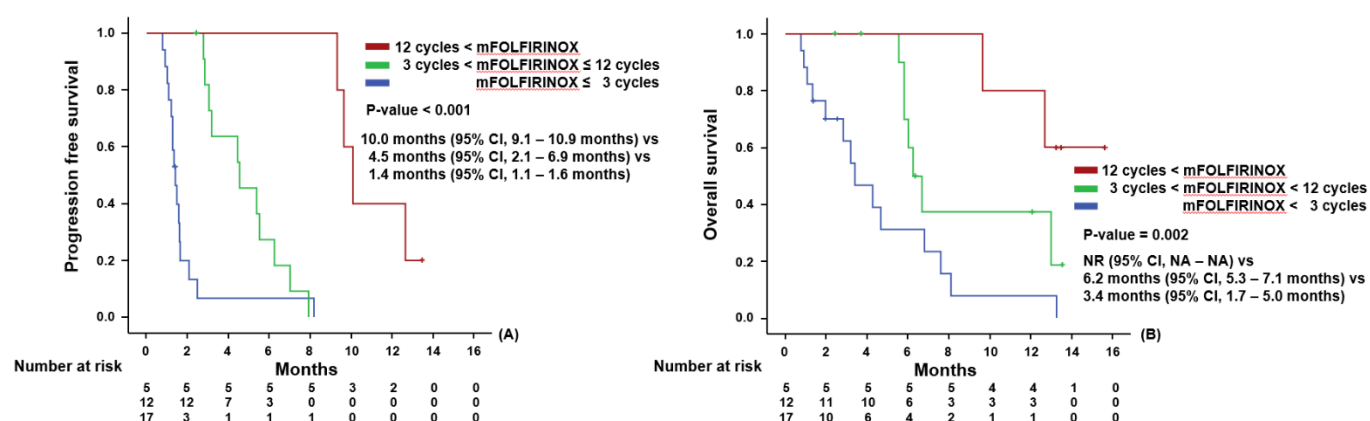

**Supplementary Figure S2.** Kaplan–Meier curves of progression-free survival (A) and overall survival (B) according to the number of mFOLFIRINOX administration.

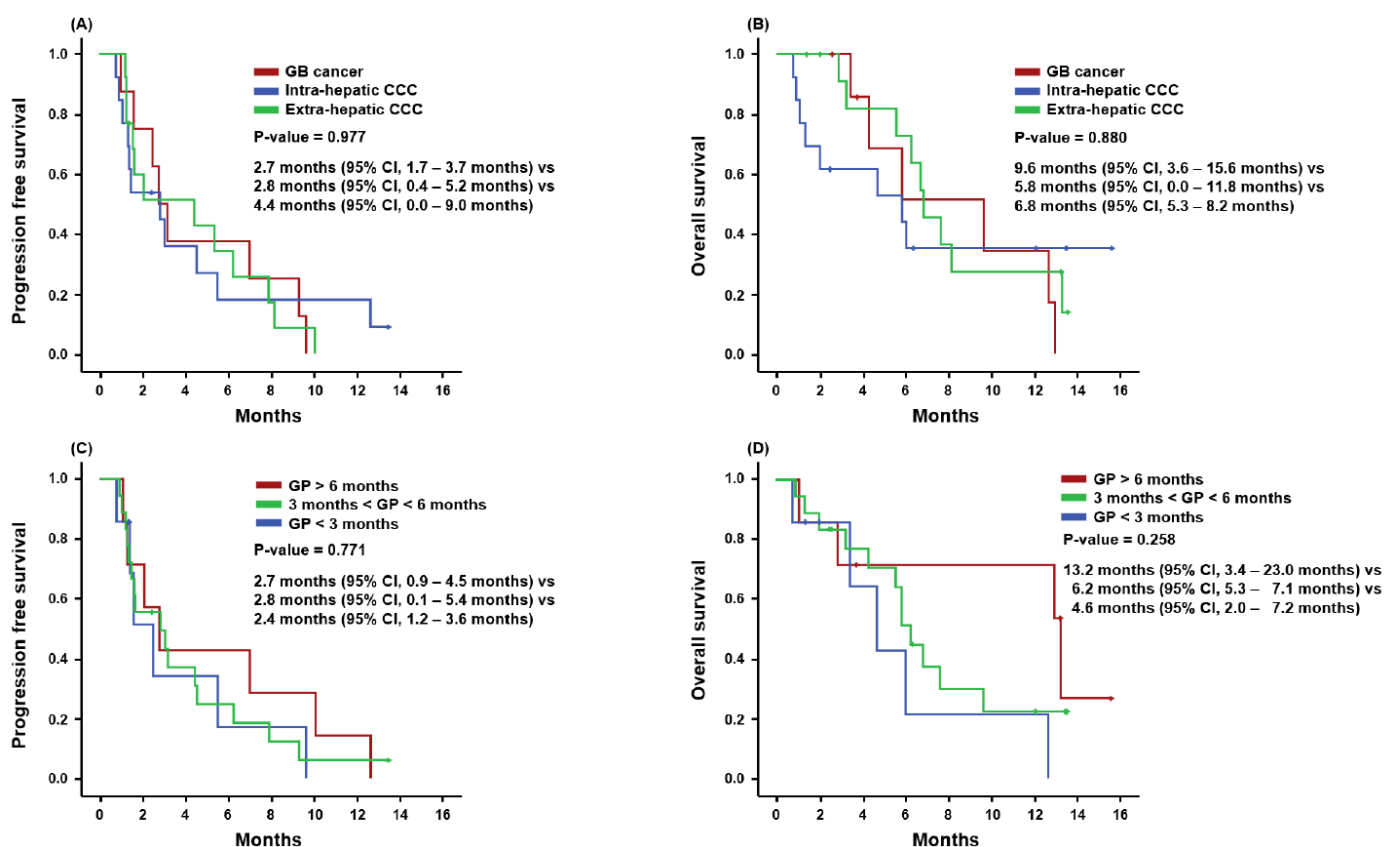

**Supplementary Figure S3.** Kaplan–Meier curves of progression-free survival (A) and overall survival (B) according to the type of biliary tract cancer. Kaplan–Meier curves of progression-free survival (C), and overall survival (D) according to the duration of first-line gemcitabine/cisplatin.

**Supplementary Table S1.** Comparison of dose, response rate, and survival results according to studies.

|                     | Lines of treatment | Study     | Disease | Chemotherapies                                                                                                                                                                                                                                        | PFS        | OS          | ORR | DCR |
|---------------------|--------------------|-----------|---------|-------------------------------------------------------------------------------------------------------------------------------------------------------------------------------------------------------------------------------------------------------|------------|-------------|-----|-----|
| A. Lamarca, et al.  | first-line         | phase III | BTC     | Oxaliplatin 85 mg/m <sup>2</sup> , Leucovorin 350 mg/m <sup>2</sup> , 5-FU bolus 400 mg/m <sup>2</sup> , 5-FU infusion 2,400 mg/m <sup>2</sup> over 46 hours                                                                                          | 4.0 months | 6.2 months  | 5%  | 33% |
| J. Phelip, et al.   | first-line         | phase II  | BTC     | Oxaliplatin 85 mg/m <sup>2</sup> , Irinotecan 180 mg/m <sup>2</sup> , Leucovorin 400 mg/m <sup>2</sup> , 5-FU bolus omitted<br>5-FU infusion 2,400 mg/m <sup>2</sup> over 46 hours                                                                    | 6.2 months | 11.7 months | 25% | 66% |
| A. Belkouz, et al.  | second-line        | phase II  | BTC     | Oxaliplatin 85 mg/m <sup>2</sup> , Irinotecan 180 mg/m <sup>2</sup> , Leucovorin 400 mg/m <sup>2</sup> , 5-FU bolus 400 mg/m <sup>2</sup><br>5-FU infusion 2,400 mg/m <sup>2</sup> over 46 hours                                                      | 6.2 months | 10.7 months | 10% | 66% |
| Liu-Fang Ye, et al. | second-line        | phase II  | BTC     | Oxaliplatin 65 mg/m <sup>2</sup> , Irinotecan 150 mg/m <sup>2</sup><br>Leucovorin 400 mg/m <sup>2</sup> , 5-FU bolus omitted<br>5-FU infusion 2,400 mg/m <sup>2</sup> over 46 hours                                                                   | 6.7 months | 13.2 months | 26% | 80% |
| Present study       | second-line        | phase II  | BTC     | Oxaliplatin 65 mg/m <sup>2</sup> , Irinotecan 135 mg/m <sup>2</sup><br>Leucovorin 400 mg/m <sup>2</sup> , 5-FU bolus omitted<br>5-FU infusion 1,000 mg/m <sup>2</sup> /day for two days                                                               | 2.8 months | 6.2 months  | 14% | 61% |
| Se-Il Go, et al.    | second-line        | phase III | PAC     | Oxaliplatin 65 mg/m <sup>2</sup> , Irinotecan 135 mg/m <sup>2</sup><br>Leucovorin 400 mg/m <sup>2</sup> , 5-FU bolus omitted<br>5-FU infusion 1,000 mg/m <sup>2</sup> /day for two days                                                               | 5.2 months | 9.2 months  | 15% | 67% |
|                     |                    |           |         | <b>BTC</b> , biliary tract cancer; <b>5-FU</b> , 5-fluorouracil; <b>PFS</b> , progression-free survival; <b>OS</b> , overall survival; <b>ORR</b> , overall response rate; <b>DCR</b> , disease control rate; <b>PAC</b> , pancreatic adenocarcinoma. |            |             |     |     |
